# Supplementary material for: Comparison of Patient‐Reported Care Satisfaction, Quality of Warfarin Therapy, and Outcomes of Atrial Fibrillation: Findings From the ORBIT‐AF Registry
Source: PubMed Central journal article supplement — J Am Heart Assoc. 2019 Apr 26;8(9):e011205. doi: 10.1161/JAHA.118.011205 (PMC6512133; doi:10.1161/jaha.118.011205), 2019-04-26
Supplement: JAH3-8-e011205-s001.pdf [file JAH3-8-e011205-s001.pdf]

**Table S1. Anti-Clot Treatment Scale Questionnaire**  
**During the past 4 weeks...**

1. How much does the possibility of bleeding as a result of anti-clot treatment limit you from taking part in vigorous physical activities? (e.g. exercise, sports, dancing, etc.)
2. How much does the possibility of bleeding as a result of anti-clot treatment limit you from taking part in your usual activities? (e.g. work, shopping, housework etc.)
3. How bothered are you by the possibility of bruising as a result of anti-clot treatment?
4. How bothered are you by having to avoid other medicines (e.g. aspirin) as a result of anti-clot treatment?
5. How much does anti-clot treatment limit your diet? (e.g. food or drink, including alcohol)
6. How much of a hassle (inconvenience) are the daily aspects of anti-clot treatment? (e.g. remembering to take your medicine at a certain time, taking the correct dose of your medicine, following a diet, limiting alcohol, etc.)
7. How much of a hassle (inconvenience) are the occasional aspects of anti-clot treatment? (e.g. the need for blood tests, going to or contacting the clinic/doctor, making arrangements for treatment while travelling etc.)

**Now I want to ask you about daily and occasional aspects of your ACT during the past 4 weeks!.**

8. How difficult is it to follow your anti-clot treatment?
9. How time-consuming is your anti-clot treatment?
10. How much do you worry about your anti-clot treatment?
11. How frustrating is your anti-clot treatment?
12. How much of a burden is your anti-clot treatment?
13. Overall, how much of a negative impact has your anti-clot treatment had on your life?
14. How confident are you that your anti-clot treatment will protect your health? (e.g. prevent blood clots, stroke, heart attack, DVT, embolism)
15. How reassured do you feel because of your anti-clot treatment?
16. How satisfied are you with your anti-clot treatment?
17. Overall, how much of a positive impact has your anti-clot treatment had on your life?

ACTS Burdens scale: questions 1-12

ACTS benefits scale: questions 14-16

Questions 13 and 17 are global response question

Patients respond on a 1-5 Likert scale (higher score corresponds to higher satisfaction)

**Table S2. Multivariate Model Covariates**

- 1) Demographics
  - a. Age: years
  - b. Gender: male/female
  - c. Level of education: some school/high school graduate/college graduate/post graduate
  - d. Payor/Insurance: Medicare or Medicaid/private/other
- 2) Medical History
  - a. Smoking: current/recent or former/non-smoker
  - b. Cancer: yes/no
  - c. Hypertension: yes/no
  - d. Diabetes: yes/no
  - e. GI bleed: yes/no
  - f. Obstructive sleep apnea: yes/no
  - g. Dialysis: yes/no
  - h. Hyperlipidemia: yes/no
  - i. Anemia: yes/no
  - j. Cognitive impairment/dementia: yes/no
  - k. Frailty: yes/no
  - l. COPD: yes/no
- 3) Atrial Fibrillation (AF) History
  - a. Type of AF: first detected or new onset/paroxysmal/persistent/permanent
  - b. AF duration
- 4) Coronary Artery Disease (CAD) History
  - a. History of coronary artery disease: yes/no
  - b. Prior MI: yes/no
  - c. Prior PCI: yes/no
- 5) Cardiovascular History (non-AF/CAD)
  - a. Peripheral vascular disease: yes/no
  - b. Stroke or TIA: yes/no
  - c. Congestive heart failure (CHF): no CHF/NYHA class I/NYHA class II/ NYHA class III&IV
  - d. Significant valvular disease: yes/no
  - e. Prior valve replacement/repair: yes/no
- 6) Echocardiographic Assessment (TTE or TEE)
  - a. LVEF: normal ( $\geq 50\%$ )/mild dysfunction ( $>40\%$ ,  $<50\%$ )/moderate dysfunction ( $\geq 30\%$ ,  $\leq 40\%$ )/severe dysfunction ( $<30\%$ )
  - b. LAD type: normal/mild enlargement/moderate enlargement/severe enlargement
- 7) Pharmacotherapy
  - a. Current aspirin use: yes/no
  - b. Current clopidogrel use: yes/no
  - c. Prior antiarrhythmic drug use: yes/no
- 8) Vital Signs
  - a. Height, cm
  - b. Diastolic blood pressure, mmHg
  - c. Systolic blood pressure, mmHg
  - d. Body mass index, kg/m<sup>2</sup>
- 9) Laboratory Data
  - a. eGFR, mg/dL (MDRD)
  - b. Hematocrit, %
- 10) Functional Status
  - a. Functional status: living independently/living with assistance, resides in assisted living facility or in skilled nursing home, or bedbound
- 11) Provider or Site
  - a. PI/site specialty: cardiology/electrophysiology/family practice or internal medicine
  - b. Region: northeast/east/midwest/west

**Table S3. Baseline Characteristics of ORBIT-AF Patients on Warfarin By Study Inclusion Status\***

| <b>Demographics</b>                                       | <b>Total<br/>(N=7,215)</b> | <b>Excluded<br/>(N=5,701)</b> | <b>Included<br/>(N=1,514)</b> | <b>P value†</b> |
|-----------------------------------------------------------|----------------------------|-------------------------------|-------------------------------|-----------------|
| <b>Age (mean±SD)</b>                                      | 74.2±10.2                  | 74.1±10.3                     | 74.5±9.8                      | 0.252           |
| <b>Female (%)</b>                                         | 3057 (42.4)                | 2416 (42.4)                   | 641 (42.3)                    | 0.798           |
| <b>Race</b>                                               |                            |                               |                               |                 |
| <b>White (%)</b>                                          | 6443 (89.3)                | 5065 (88.8)                   | 1378 (91.0)                   | <0.001          |
| <b>CHADS<sub>2</sub> Score Group (%)</b>                  |                            |                               |                               | 0.003           |
| <b>0-1</b>                                                | 1700 (23.6)                | 1299 (22.8)                   | 401 (26.5)                    |                 |
| <b>≥2</b>                                                 | 5515 (76.4)                | 4402 (77.2)                   | 1113 (73.5)                   |                 |
| <b>CHADS<sub>2</sub> Score (mean±SD)</b>                  | 2.4±1.3                    | 2.4±1.3                       | 2.3±1.3                       | <0.001          |
| <b>CHA<sub>2</sub>DS<sub>2</sub>-VASc Score (mean±SD)</b> | 4.1±1.7                    | 4.1±1.7                       | 3.9±1.7                       | <0.001          |
| <b>Non-Paroxysmal AF (%)</b>                              | 3665 (50.8)                | 2931 (51.4)                   | 734 (48.5)                    | <0.001          |

\*Inclusion required ACTS questionnaire completion and follow-up available, †Differences between excluded and included patients assessed using the chi-squared test and Wilcoxon rank-sum test for categorical and continuous variables, respectively  
 ACTS: anti-clot treatment scale, AF: atrial fibrillation

**Table S4. Baseline Characteristics by ACTS Benefit Score Quartile**

|                                                           | ACTS Benefit Score<br>(N=1,513) |                       |                       |                       |                        | P value† |
|-----------------------------------------------------------|---------------------------------|-----------------------|-----------------------|-----------------------|------------------------|----------|
|                                                           | Total<br>(N=1,513)              | Quartile 1<br>(N=310) | Quartile 2<br>(N=379) | Quartile 3<br>(N=492) | Quartile 4*<br>(N=332) |          |
| <b>ACTS Score (mean±SD)</b>                               | 10.7±3.4                        | 5.2±1.9               | 9.8±0.8               | 12.2±0.4              | 14.8±0.4               | <0.001   |
| <b>Demographics</b>                                       |                                 |                       |                       |                       |                        |          |
| <b>Age (mean±SD)</b>                                      | 74.5±9.8                        | 74.5±9.6              | 73.0±10.3             | 75.3±9.7              | 75.2±9.3               | 0.004    |
| <b>Female (%)</b>                                         | 641 (42.4)                      | 132 (42.6)            | 169 (44.6)            | 214 (43.5)            | 126 (38.0)             | 0.298    |
| <b>Race</b>                                               |                                 |                       |                       |                       |                        | 0.306    |
| <b>White (%)</b>                                          | 1377 (91.0)                     | 282 (91.6)            | 346 (91.3)            | 438 (89.0)            | 311 (93.7)             |          |
| <b>CHADS<sub>2</sub> Score Group (%)</b>                  |                                 |                       |                       |                       |                        | 0.437    |
| <b>0-1</b>                                                | 401 (26.5)                      | 81 (26.1)             | 104 (27.4)            | 120 (24.4)            | 96 (28.9)              |          |
| <b>≥2</b>                                                 | 1112 (73.5)                     | 229 (73.9)            | 275 (72.6)            | 372 (75.6)            | 236 (71.1)             |          |
| <b>CHADS<sub>2</sub> Score (mean±SD)</b>                  | 2.3±1.3                         | 2.3±1.2               | 2.3±1.3               | 2.3±1.3               | 2.2±1.2                | 0.764    |
| <b>CHA<sub>2</sub>DS<sub>2</sub>-VASc Score (mean±SD)</b> | 3.9±1.7                         | 4.0±1.6               | 4.0±1.8               | 4.0±1.7               | 3.8±1.6                | 0.612    |
| <b>Non-Paroxysmal AF (%)</b>                              | 734 (48.5)                      | 146 (47.1)            | 184 (48.6)            | 238 (48.4)            | 166 (50.0)             | 0.580    |
| <b>Heart Failure (%)</b>                                  | 427 (28.2)                      | 87 (28.1)             | 116 (30.6)            | 133 (27.0)            | 91 (27.4)              | 0.678    |
| <b>CKD (%)</b>                                            | 525 (34.7)                      | 105 (37.2)            | 130 (36.6)            | 171 (38.7)            | 119 (39.3)             | 0.884    |
| <b>Coronary Artery Disease (%)</b>                        | 478 (31.6)                      | 109 (35.2)            | 113 (29.8)            | 162 (32.9)            | 94 (28.3)              | 0.218    |
| <b>Myocardial Infarction (%)</b>                          | 212 (14.0)                      | 48 (15.5)             | 51 (13.5)             | 63 (12.8)             | 50 (15.1)              | 0.670    |
| <b>Stroke/TIA (%)</b>                                     | 254 (16.8)                      | 43 (13.9)             | 74 (19.5)             | 87 (17.7)             | 50 (15.1)              | 0.178    |
| <b>Peripheral Artery Disease (%)</b>                      | 186 (12.3)                      | 36 (11.6)             | 44 (11.6)             | 69 (14.0)             | 37 (11.1)              | 0.558    |
| <b>Diabetes (%)</b>                                       | 416 (27.5)                      | 100 (32.3)            | 108 (28.5)            | 129 (26.2)            | 79 (23.8)              | 0.094    |
| <b>Hypertension (%)</b>                                   | 1268 (83.8)                     | 264 (85.2)            | 324 (85.5)            | 411 (83.5)            | 269 (81.0)             | 0.372    |
| <b>Anemia (%)</b>                                         | 225 (14.9)                      | 48 (15.5)             | 52 (13.7)             | 75 (15.2)             | 50 (15.1)              | 0.907    |
| <b>GI Bleed (%)</b>                                       | 100 (6.6)                       | 25 (8.1)              | 22 (5.8)              | 27 (5.5)              | 26 (7.8)               | 0.352    |
| <b>Care Model</b>                                         |                                 |                       |                       |                       |                        |          |
| <b>Payor/Insurance (%)</b>                                |                                 |                       |                       |                       |                        | 0.075    |
| <b>Medicaid/Medicare</b>                                  | 1116 (73.8)                     | 236 (76.1)            | 265 (69.9)            | 369 (75.0)            | 246 (74.1)             |          |
| <b>Private</b>                                            | 319 (21.1)                      | 61 (19.7)             | 96 (25.3)             | 89 (18.1)             | 73 (22.0)              |          |
| <b>Other</b>                                              | 78 (5.2)                        | 13 (4.2)              | 18 (4.8)              | 34 (6.9)              | 13 (3.9)               |          |
| <b>OAC Management (%)</b>                                 |                                 |                       |                       |                       |                        |          |
| <b>Home INR Monitoring</b>                                | 46 (3.0)                        | 6 (1.9)               | 15 (4.0)              | 12 (2.4)              | 13 (3.9)               | 0.280    |
| <b>Anticoagulation Clinic</b>                             | 601 (39.7)                      | 140 (45.2)            | 142 (37.5)            | 198 (40.2)            | 121 (36.5)             | 0.103    |
| <b>Cardiology Care (%)</b>                                | 1265 (83.6)                     | 254 (81.9)            | 322 (85.0)            | 419 (85.2)            | 270 (81.3)             | 0.352    |
| <b>Medication Use</b>                                     |                                 |                       |                       |                       |                        |          |
| <b>Prior Warfarin Use‡ (%)</b>                            | 1397 (92.3)                     | 288 (92.9)            | 341 (90.0)            | 458 (93.1)            | 310 (93.4)             | 0.258    |
| <b>Beta Blockers (%)</b>                                  | 1015 (67.1)                     | 195 (62.9)            | 252 (66.5)            | 336 (68.3)            | 232 (69.9)             | 0.287    |
| <b>Calcium Channel Blockers§ (%)</b>                      | 250 (16.5)                      | 62 (20.0)             | 71 (18.7)             | 65 (13.2)             | 52 (15.7)              | 0.041    |
| <b>Digoxin (%)</b>                                        | 387 (25.6)                      | 89 (28.7)             | 95 (25.1)             | 133 (27.0)            | 70 (21.1)              | 0.121    |
| <b>Amiodarone (%)</b>                                     | 125 (8.3)                       | 28 (9.0)              | 22 (5.8)              | 47 (9.6)              | 28 (8.4)               | 0.225    |
| <b>Rhythm Control Agents (%)</b>                          | 384 (25.4)                      | 78 (25.2)             | 89 (23.5)             | 130 (26.4)            | 87 (26.2)              | 0.770    |
| <b>Anti-Platelet Agents (%)</b>                           | 558 (36.9)                      | 111 (35.8)            | 139 (36.7)            | 189 (38.4)            | 119 (35.8)             | 0.847    |
| <b>Statins (%)</b>                                        | 789 (52.2)                      | 171 (55.2)            | 184 (48.6)            | 269 (54.7)            | 165 (49.7)             | 0.152    |

\*ACTS score quartile with greatest benefit, †Differences between quartiles assessed using the chi-squared test and Kruskal-Wallis test for categorical and continuous variables, respectively, ‡Prior to enrollment in ORBIT-AF, §Non-dihydropyridine calcium channel blockers

ACTS: anti-clot treatment scale, AF: atrial fibrillation, INR: international normalized ratio, CKD: chronic kidney disease, TIA: transient ischemic attack

**Table S5. Association of ACTS Scores with Warfarin and AF Outcomes in Patients with CHA<sub>2</sub>DS<sub>2</sub>-VASc ≥ 4**

| <b>ACTS Burden Score</b>                |                                   |                |                                   |                |
|-----------------------------------------|-----------------------------------|----------------|-----------------------------------|----------------|
|                                         | <b>Univariate*</b>                |                | <b>Multivariate*<sup>†</sup></b>  |                |
|                                         | <b>OR/HR<sup>‡</sup> (95% CI)</b> | <b>P Value</b> | <b>OR/HR<sup>‡</sup> (95% CI)</b> | <b>P Value</b> |
| <b>TTR ≥ 75%<sup>§</sup></b>            | 1.03 (1.00 - 1.05)                | 0.022          | 1.02 (1.00 - 1.05)                | 0.072          |
| <b>TTR ≥ 60%<sup>§</sup></b>            | 1.02 (1.00 - 1.03)                | 0.064          | 1.01 (0.98 - 1.03)                | 0.586          |
| <b>Warfarin Discontinuation</b>         | 0.98 (0.95 - 1.00)                | 0.044          | 0.98 (0.95 - 1.01)                | 0.177          |
| <b>Overall Mortality</b>                | 0.99 (0.96 - 1.01)                | 0.382          | 0.99 (0.96 - 1.02)                | 0.494          |
| <b>Cardioembolic Event<sup>  </sup></b> | 1.04 (0.97 - 1.12)                | 0.261          | 1.03 (0.96 - 1.11)                | 0.399          |
| <b>Major Bleed</b>                      | 1.00 (0.96 - 1.04)                | 0.943          | 0.99 (0.94 - 1.04)                | 0.299          |
| <b>All-Cause Hospitalization</b>        | 0.99 (0.98 - 1.00)                | 0.192          | 0.99 (0.98 - 1.00)                | 0.114          |
| <b>ACTS Benefit Score</b>               |                                   |                |                                   |                |
|                                         | <b>Univariate*</b>                |                | <b>Multivariate*<sup>†</sup></b>  |                |
|                                         | <b>OR/HR<sup>‡</sup> (95% CI)</b> | <b>P Value</b> | <b>OR/HR<sup>‡</sup> (95% CI)</b> | <b>P Value</b> |
| <b>TTR ≥ 75%<sup>§</sup></b>            | 1.02 (0.97 - 1.07)                | 0.499          | 1.00 (0.94 - 1.07)                | 0.930          |
| <b>TTR ≥ 60%<sup>§</sup></b>            | 1.01 (0.96 - 1.07)                | 0.661          | 1.01 (0.95 - 1.08)                | 0.743          |
| <b>Warfarin Discontinuation</b>         | 1.03 (0.96 - 1.10)                | 0.408          | 1.03 (0.94 - 1.12)                | 0.530          |
| <b>Overall Mortality</b>                | 0.98 (0.93 - 1.03)                | 0.397          | 0.95 (0.91 - 1.00)                | 0.047          |
| <b>Cardioembolic Event<sup>  </sup></b> | 1.09 (0.96 - 1.24)                | 0.179          | 1.15 (0.98 - 1.35)                | 0.082          |
| <b>Major Bleed</b>                      | 0.98 (0.90 - 1.07)                | 0.648          | 1.01 (0.92 - 1.11)                | 0.865          |
| <b>All-Cause Hospitalization</b>        | 0.99 (0.96 - 1.01)                | 0.353          | 0.99 (0.96 - 1.02)                | 0.612          |

\*Logistic regression: TTR; Cox proportional hazard regression: Warfarin discontinuation, Overall mortality, Cardioembolic event, Major bleed, All-cause hospitalization, <sup>†</sup>Covariates: patient demographics, medical history, AF history, medications, functional status, care model, and region (see Supplemental Table 2 for full covariate list), <sup>‡</sup>OR/HR per 1-point increase in ACTS scores; <sup>§</sup>Over 1 year, <sup>||</sup>Stroke/transient ischemic attack or systemic embolism

ACTS: anti-clot treatment scale, AF: atrial fibrillation, OAC: oral anticoagulation, TTR: time in therapeutic range

**Table S6. Association of ACTS Scores with Warfarin and AF Outcomes in Patients with CHA<sub>2</sub>DS<sub>2</sub>-VASc < 4**

| <b>ACTS Burden Score</b>                |                                   |                |                                   |                |
|-----------------------------------------|-----------------------------------|----------------|-----------------------------------|----------------|
|                                         | <b>Univariate*</b>                |                | <b>Multivariate*<sup>†</sup></b>  |                |
|                                         | <b>OR/HR<sup>‡</sup> (95% CI)</b> | <b>P Value</b> | <b>OR/HR<sup>‡</sup> (95% CI)</b> | <b>P Value</b> |
| <b>TTR ≥ 75%<sup>§</sup></b>            | 1.01 (0.98 - 1.04)                | 0.686          | 1.00 (0.97 - 1.03)                | 0.878          |
| <b>TTR ≥ 60%<sup>§</sup></b>            | 1.01 (0.99 - 1.04)                | 0.312          | 1.00 (0.97 - 1.04)                | 0.814          |
| <b>Warfarin Discontinuation</b>         | 0.98 (0.96 - 1.00)                | 0.092          | 1.00 (0.97 - 1.03)                | 0.999          |
| <b>Overall Mortality</b>                | 1.03 (0.94 - 1.12)                | 0.575          | 1.08 (0.94 - 1.25)                | 0.290          |
| <b>Cardioembolic Event<sup>  </sup></b> | 1.03 (0.94 - 1.14)                | 0.509          | -                                 | -              |
| <b>Major Bleed</b>                      | 0.97 (0.93 - 1.01)                | 0.123          | 0.95 (0.88 - 1.02)                | 0.164          |
| <b>All-Cause Hospitalization</b>        | 0.99 (0.97 - 1.00)                | 0.057          | 0.99 (0.98 - 1.01)                | 0.589          |
| <b>ACTS Benefit Score</b>               |                                   |                |                                   |                |
|                                         | <b>Univariate*</b>                |                | <b>Multivariate*<sup>†</sup></b>  |                |
|                                         | <b>OR/HR<sup>‡</sup> (95% CI)</b> | <b>P Value</b> | <b>OR/HR<sup>‡</sup> (95% CI)</b> | <b>P Value</b> |
| <b>TTR ≥ 75%<sup>§</sup></b>            | 1.03 (0.97 - 1.09)                | 0.310          | 1.03 (0.97 - 1.10)                | 0.347          |
| <b>TTR ≥ 60%<sup>§</sup></b>            | 1.04 (0.98 - 1.09)                | 0.167          | 1.04 (0.97 - 1.11)                | 0.266          |
| <b>Warfarin Discontinuation</b>         | 0.99 (0.94 - 1.05)                | 0.745          | 0.99 (0.92 - 1.06)                | 0.695          |
| <b>Overall Mortality</b>                | 1.06 (0.94 - 1.20)                | 0.351          | 1.14 (0.84 - 1.54)                | 0.406          |
| <b>Cardioembolic Event<sup>  </sup></b> | 0.94 (0.82 - 1.09)                | 0.441          | -                                 | -              |
| <b>Major Bleed</b>                      | 0.91 (0.83 - 1.00)                | 0.042          | 0.89 (0.79 - 1.01)                | 0.071          |
| <b>All-Cause Hospitalization</b>        | 0.99 (.095 - 1.02)                | 0.494          | 1.00 (0.97 - 1.04)                | 0.969          |

\*Logistic regression: TTR; Cox proportional hazard regression: Warfarin discontinuation, Overall mortality, Cardioembolic event, Major bleed, All-cause hospitalization, <sup>†</sup>Covariates: patient demographics, medical history, AF history, medications, functional status, care model, and region (see Supplemental Table 2 for full covariate list), <sup>‡</sup>OR/HR per 1-point increase in ACTS scores; <sup>§</sup>Over 1 year, <sup>||</sup>Stroke/transient ischemic attack or systemic embolism

ACTS: anti-clot treatment scale, AF: atrial fibrillation, OAC: oral anticoagulation, TTR: time in therapeutic range
